# Supplementary material for: Quantitative evaluation of numerical integration schemes for Lagrangian particle dispersion models
Source: Copernicus journal article supplement (doi:10.5194/gmd-2016-45), 2016-03-15
Supplement: Supplementary file [file gmd-2016-45-RC1-supplement.pdf]

## Comments on ‘Quantitative evaluation of numerical integration schemes for Lagrangian particle dispersion models’

This is a well written and informative paper concerning the numerical integration of a class of stochastic differential equations commonly used in atmospheric dispersion models using different numerical methods. These methods are compared both with each other and the results of the corresponding Fokker-Planck equation and the numerical solution of an appropriate diffusion equation (or random walk model). The authors’ results provide a useful benchmark for selecting an appropriate numerical method and as such are likely to have widespread application. I have a few minor comments.

### Minor comments

p.4 End of first line of §2.2 (l.6): delete extra ‘the’.

p.4 Beginning of §2.2: it would be useful to define  $\omega$ .

p.5 l.16: I think it would be useful to state explicitly what the initial conditions for  $C_k$  are.

p.6 Regarding equation (6) and the preceding text: the random walk model or diffusion equation is only a well-justified approximation of a Lagrangian particle dispersion model (equation (1)) for small  $\tau$ .

p.9 Line 23 and again in the caption to figure 5: is it necessary to include ‘1’ in  $t = 1h/u_*$ ?

p.11 Appendix A: you may wish to consider quoting the result for  $\int_{-\infty}^{\infty} e^{-\omega^2/2} \text{He}_k(\omega) d\omega$  which I found useful.

Fig. 1 Fig. 1 is not referred to until p. 10 (l. 3). Did the authors mean to refer to the figure earlier in the study?
